# Supplementary material for: Glycosylated clusterin species facilitate Aβ toxicity in human neurons
Source: PubMed Central journal article supplement (PMC9633591; doi:10.1038/s41598-022-23167-z), 2022-11-03
Supplement: 41598_2022_23167_MOESM2_ESM.pdf [file 41598_2022_23167_MOESM2_ESM.pdf]

## Supplementary figure 2

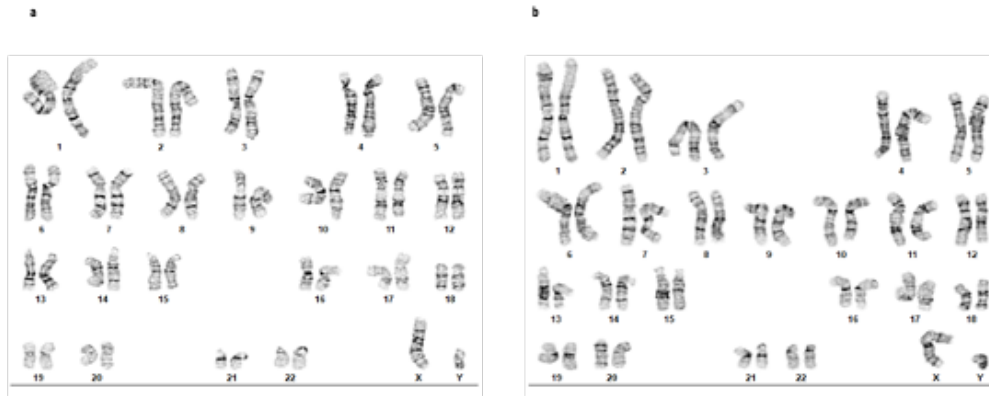

**Supplementary figure 2.** Karyotyping of (a) A4 and (b) D1 iPSCs. No chromosomal abnormalities were identified in either line. A4 (46, X, Y) and D1 (46, X, Y). A standard metaphase karyotype (band resolution 475-525) was performed and identified no missing or additional chromosomes in either line.
