# Supplementary material for: Glycosylated clusterin species facilitate Aβ toxicity in human neurons
Source: PubMed Central journal article supplement (PMC9633591; doi:10.1038/s41598-022-23167-z), 2022-11-03
Supplement: 41598_2022_23167_MOESM5_ESM.pdf [file 41598_2022_23167_MOESM5_ESM.pdf]

## Supplementary figure 5

### Figure 1a upper blot iCLU original

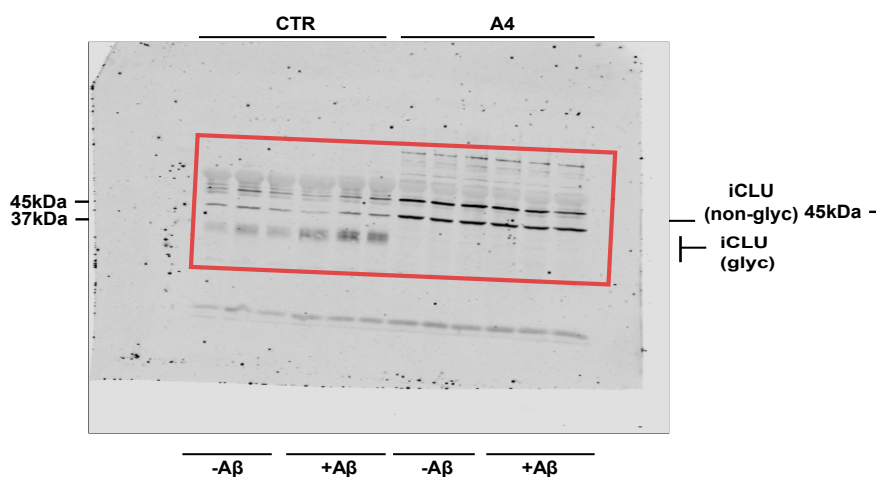

### Figure 1a beta actin blot original

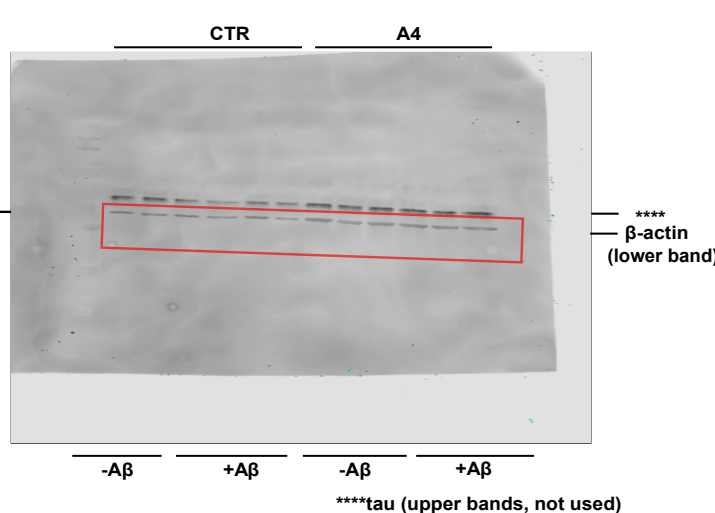

### Figure 1b upper blot iCLU original

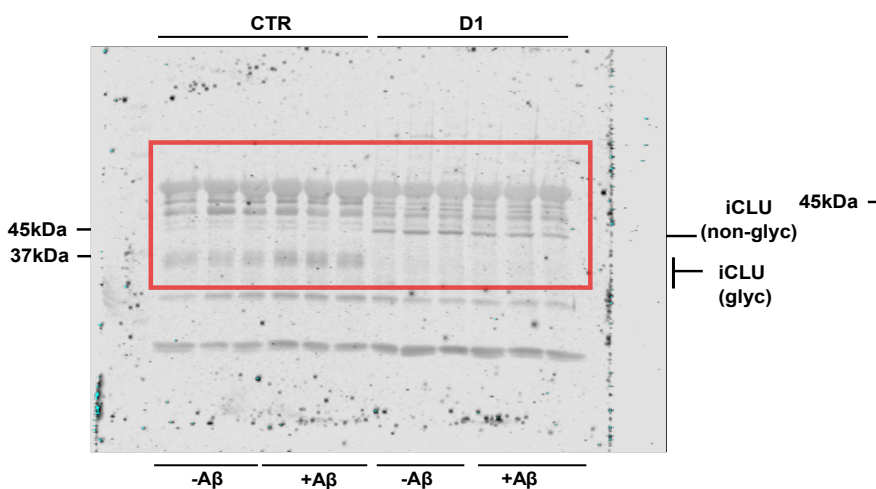

### Figure 1b beta actin blot original

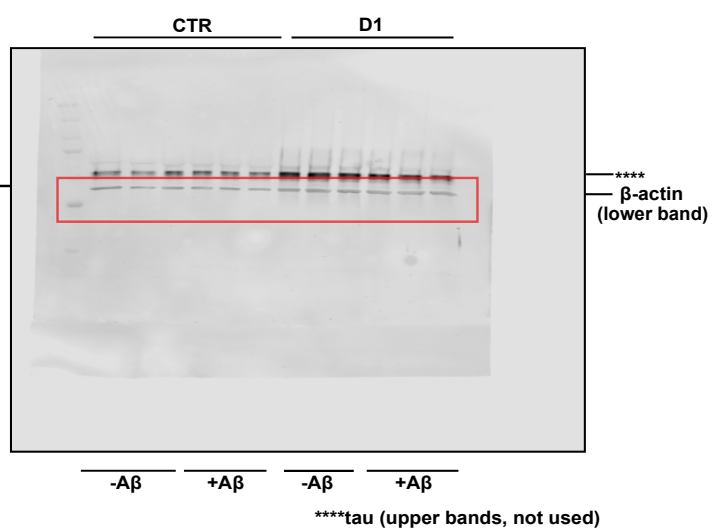

### Figure 1a lower blot sCLU original blot

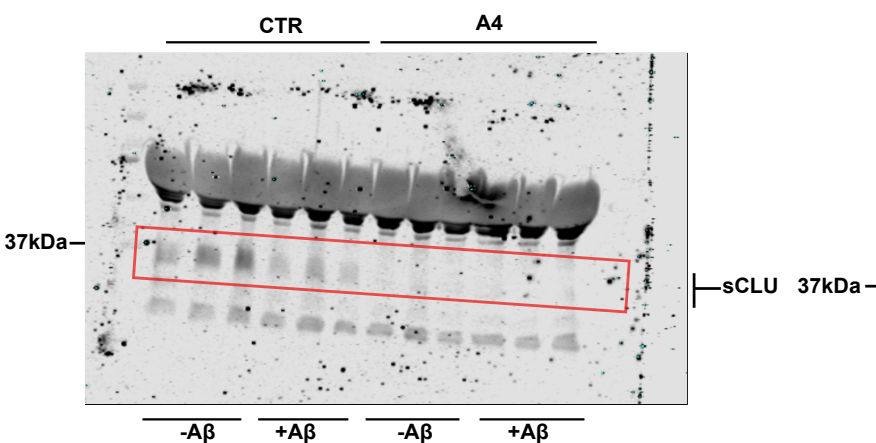

### Figure 1b lower blot sCLU original blot

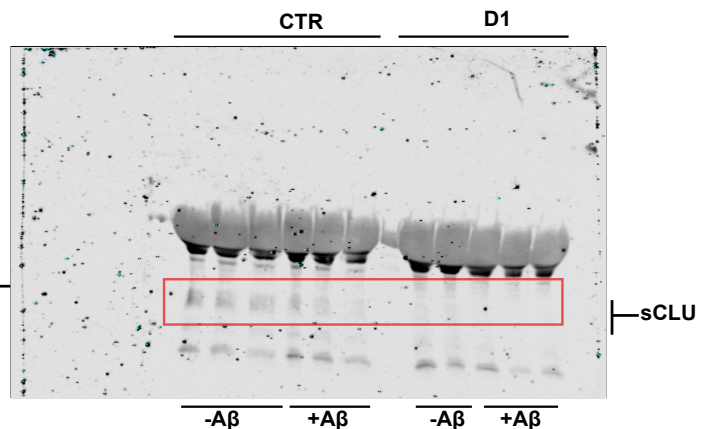

**Supplementary figure 5.** Original and uncropped western blots for immunostaining of CLU and  $\beta$ -actin.

All blots were stained with goat anti-clusterin primary to stain both intracellular and secreted clusterin proteins. For loading control staining blots were stained with rabbit anti-  $\beta$ -actin primary.

Blots displaying  $\beta$ -actin also display additional bands staining for tau (rabbit primary) but these were not used in subsequent analysis
