# Supplementary material for: Glycosylated clusterin species facilitate Aβ toxicity in human neurons
Source: PubMed Central journal article supplement (PMC9633591; doi:10.1038/s41598-022-23167-z), 2022-11-03
Supplement: 41598_2022_23167_MOESM6_ESM.pdf [file 41598_2022_23167_MOESM6_ESM.pdf]

## Supplementary figure 6

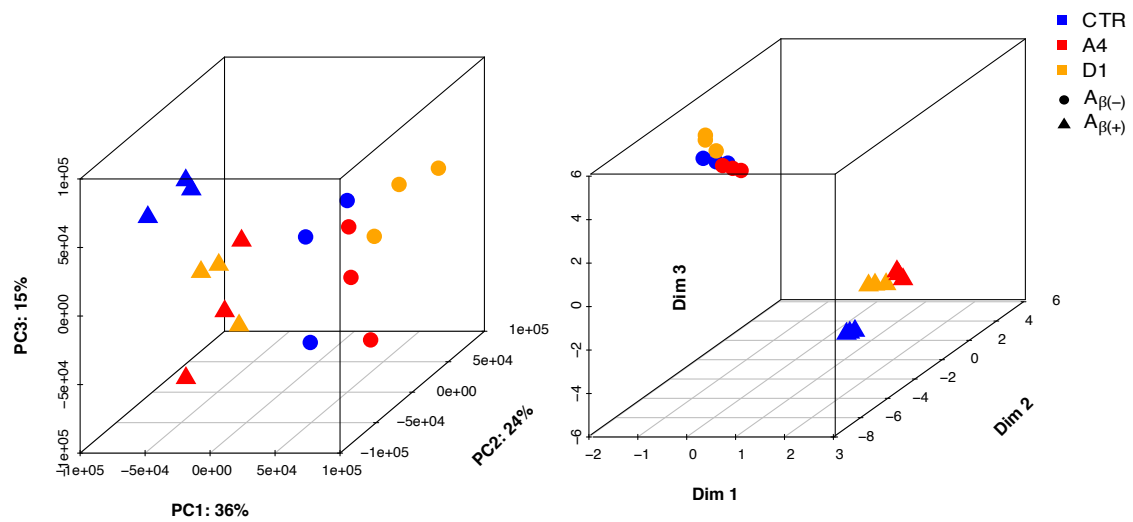

**Supplementary figure 6.** Dimensionality reduction of the normalized counts across samples. Principal component analysis (PCA) accounting for 75% (PC1-PC3) of the cumulative variance of uniform manifold approximation and projection (UMAP).
